# Supplementary material for: Extensive White Matter Alterations and Its Correlations with Ataxia Severity in SCA 2 Patients
Source: PubMed Central journal article supplement (PMC4532454; doi:10.1371/journal.pone.0135449), 2015-08-11

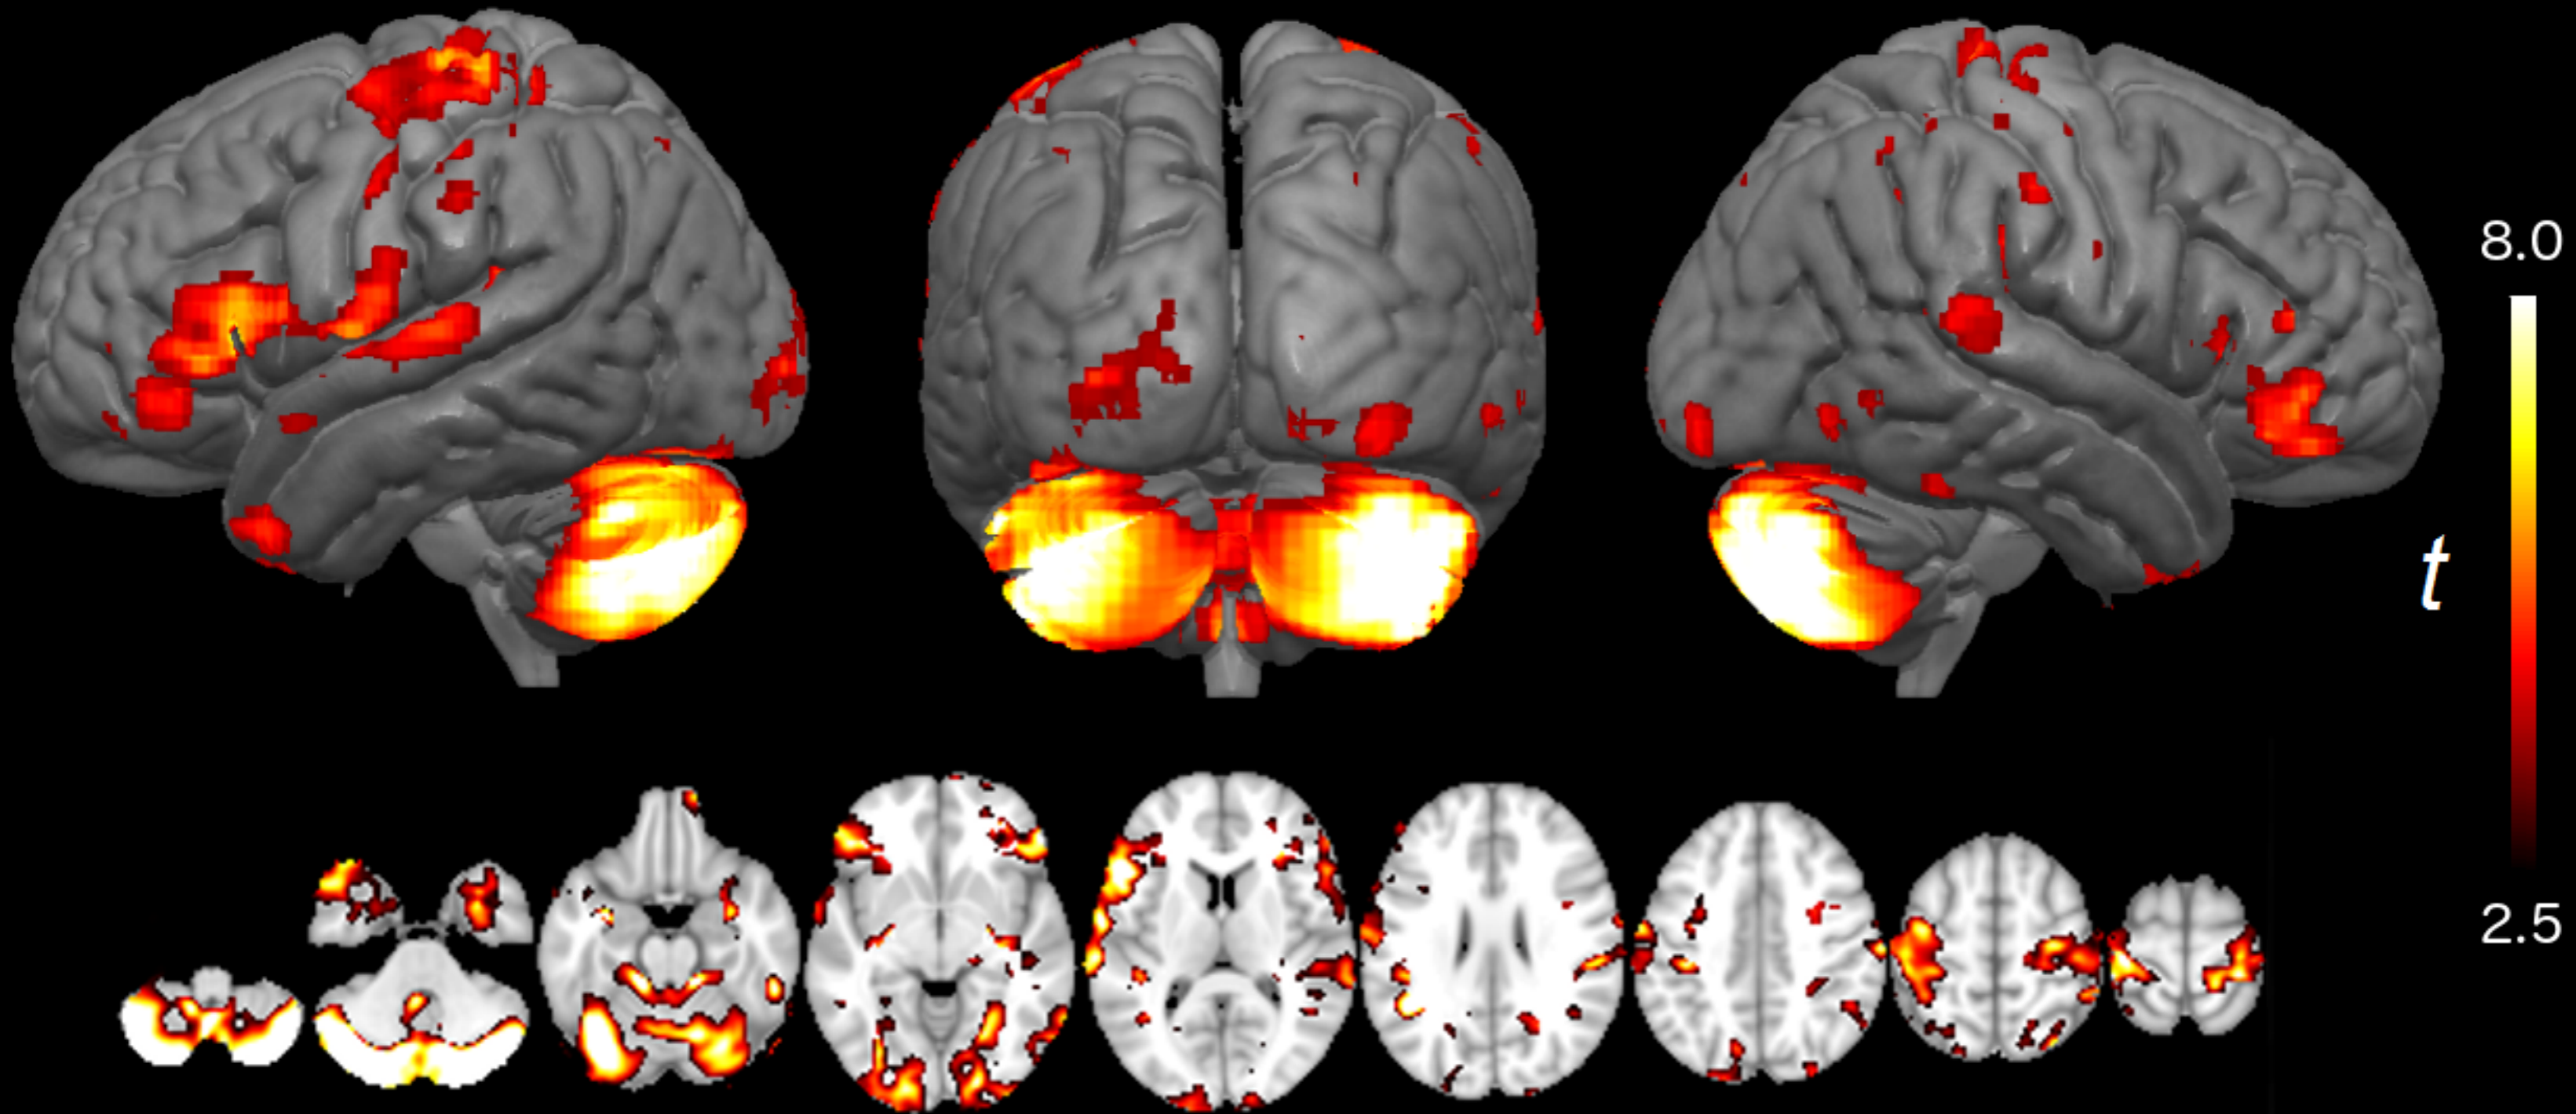

Supplement: pone.0135449.s001.pdf [file pone.0135449.s001.pdf]
