# Supplementary material for: Extensive White Matter Alterations and Its Correlations with Ataxia Severity in SCA 2 Patients
Source: PubMed Central journal article supplement (PMC4532454; doi:10.1371/journal.pone.0135449), 2015-08-11
Supplement: pone.0135449.s002.pdf [file pone.0135449.s002.pdf]

Table S1. Demographic Information

| <b>ID</b> | <b>Age</b> | <b>Age at onset</b> | <b>CAG</b> | <b>SARA</b> |
|-----------|------------|---------------------|------------|-------------|
| P01       | 58         | 14                  | 37         | 17.5        |
| P02       | 31         | 25                  | 42         | 17          |
| P03       | 29         | 25                  | 42         | 20          |
| P04       | 20         | 14                  | 45         | 10.5        |
| P05       | 65         | 45                  | 40         | 25          |
| P06       | 60         | 42                  | 39         | 20          |
| P07       | 35         | 30                  | 45         | 8.5         |
| P08       | 29         | 25                  | 51         | 27          |
| P09       | 20         | 15                  | 52         | 19.5        |
| P10       | 46         | 36                  | 42         | 17          |
| P11       | 43         | 28                  | 46         | 25          |
| P12       | 19         | 19                  | 42         | 5.5         |
| P13       | 48         | 46                  | 38         | 11          |
| P14       | 41         | 18                  | 48         | 33.5        |
