# Supplementary material for: Extensive White Matter Alterations and Its Correlations with Ataxia Severity in SCA 2 Patients
Source: PubMed Central journal article supplement (PMC4532454; doi:10.1371/journal.pone.0135449), 2015-08-11
Supplement: pone.0135449.s003.pdf [file pone.0135449.s003.pdf]

Supplementary Table S2. White matter regions showing significant FA decreases in SCA2.

| <b>Anatomical Region</b>                       | <b>X</b> | <b>Y</b> | <b>Z</b> | <b>t</b> |
|------------------------------------------------|----------|----------|----------|----------|
| Middle Cerebellar Peduncle                     | 2        | -16      | -26      | -16.1    |
| Right Inferior Cerebellar Peduncle             | 11       | -44      | -34      | -11.5    |
| Right Posterior Limb of Internal Capsule       | 18       | -18      | -3       | -8.3     |
| Right Superior Corona Radiata                  | 31       | -8       | 23       | -8.3     |
| Right Posterior Thalamic Radiation             | 29       | -68      | 14       | -8.1     |
| Left Temporal Lobe                             | -45      | -42      | 14       | -7.9     |
| Left Posterior Limb of Internal Capsule        | -21      | -20      | -3       | -7.8     |
| Right Posterior Cerebellum Tonsil              | 32       | -60      | -37      | -7.1     |
| Right Temporal lobe                            | 45       | -40      | -2       | -6.9     |
| Right Medial Lemniscus                         | 5        | -35      | -31      | -6.2     |
| Right Retrolenticular part of Internal Capsule | 36       | -33      | 6        | -5.9     |
| Left Superior Longitudinal Fasciculus          | -39      | -23      | 30       | -5.9     |
| Right Medial Frontal Gyrus                     | 15       | 27       | 44       | -5.7     |
| Right Superior Corona Radiata                  | 18       | -9       | 38       | -5.7     |
| Left Frontal Lobe                              | -30      | 35       | 3        | -5.2     |
| Left Superior Cerebellar Peduncle              | -9       | -52      | -31      | -5.2     |
| Left Medial Frontal Gyrus                      | -14      | 21       | 46       | -4.9     |
| Right Superior Longitudinal Fasciculus         | 43       | -13      | 29       | -4.9     |
| Left Superior Corona Radiata                   | -18      | 10       | 33       | -4.8     |
| Fornix                                         | 0        | -4       | 14       | -4.5     |
| Left Superior Parietal Lobe                    | -17      | -60      | 43       | -4.4     |
| Right Medial Frontal Gyrus                     | 13       | 54       | -11      | -4.1     |

Coordinates in MNI space in millimeters. Highlighted rows indicates white matter regions showing correlation between FA and SARA.
