# Supplementary material for: Extensive White Matter Alterations and Its Correlations with Ataxia Severity in SCA 2 Patients
Source: PubMed Central journal article supplement (PMC4532454; doi:10.1371/journal.pone.0135449), 2015-08-11
Supplement: pone.0135449.s004.pdf [file pone.0135449.s004.pdf]

Supplementary Table S3. White matter regions showing significant MD increases in SCA2.

| <b>Anatomical region</b>                 | <b>X</b> | <b>Y</b> | <b>Z</b> | <b>t</b> |
|------------------------------------------|----------|----------|----------|----------|
| Left Anterior Cerebellum Dentate         | -15      | -56      | -29      | 12.9     |
| Right Medial Lemniscus                   | 5        | -35      | -35      | 11.5     |
| Middle Cerebellar Peduncle               | 23       | -47      | -38      | 8.6      |
| Right Superior Corona Radiata            | 27       | 12       | 24       | 8.27     |
| Right Posterior Cerebellum Tonsil        | 30       | -63      | -36      | 7.9      |
| Left Temporal Lobe                       | -45      | -10      | -18      | 7.16     |
| Right Posterior Limb of Internal Capsule | 22       | -18      | -3       | 6.8      |
| Pontine Crossing Tract                   | 0        | -32      | -35      | 6.8      |
| Middle Cerebellar Peduncle               | -17      | -46      | -33      | 6.14     |
| Right Temporal Lobe                      | 41       | -13      | -15      | 6.05     |
| Splenium of Corpus Callosum              | 16       | -38      | 10       | 6.03     |
| Right Corticospinal Tract                | 9        | -20      | -26      | 5.9      |
| Right Anterior Corona Radiata            | 17       | 37       | 1        | 5.84     |
| Left Middle Temporal Lobe                | -49      | -41      | -5       | 5.65     |
| Pontine crossing Tract                   | 1        | -32      | -35      | 5.55     |
| Left Precentral Gyrus                    | -40      | -1       | 30       | 5.12     |
| Right Corticospinal Tract                | 9        | -24      | -29      | 5.12     |
| Genu of Corpus Callosum                  | -3       | 22       | -1       | 4.79     |
| Right Superior Longitudinal Fasciculus   | 43       | -24      | 31       | 4.7      |
| Left Anterior Corona Radiata             | -14      | 33       | -8       | 4.6      |
| Left Corticospinal Tract                 | -8       | -20      | -25      | 4.12     |

Coordinates in MNI space in millimeters. Highlighted rows indicates white matter regions showing correlation between MD and SARA.
